# Supplementary material for: Cold-Induced Pyroelectric Stimulation Enhances Implant Osteointegration via TRPM8 Activation
Source: Research Square preprint supplement (doi:10.21203/rs.3.rs-6372555/v1), 2025-05-05
Supplement: Supplementary file 1 [file 994d20b379abc9811ddd5324.docx]

Supporting Information

Cold-Induced Pyroelectric Stimulation Enhances Implant Osteointegration via TRPM8 Activation


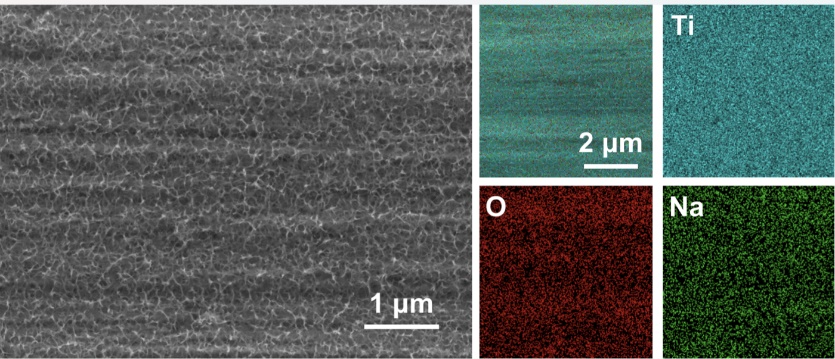


**Figure S1** FESEM image of the NTO-Ti surface.


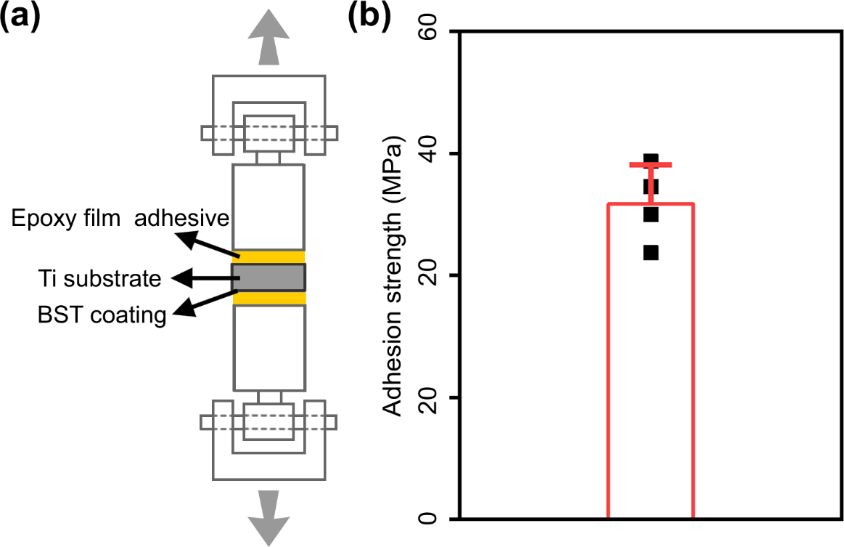


**Figure S2** Adhesion-tension test. (a)Schematic illustration of adhesion-tension test. (b) Adhesion strength between coating and substrate of pyroTi. Data are presented as mean values ± SD (n = 4 for each group).


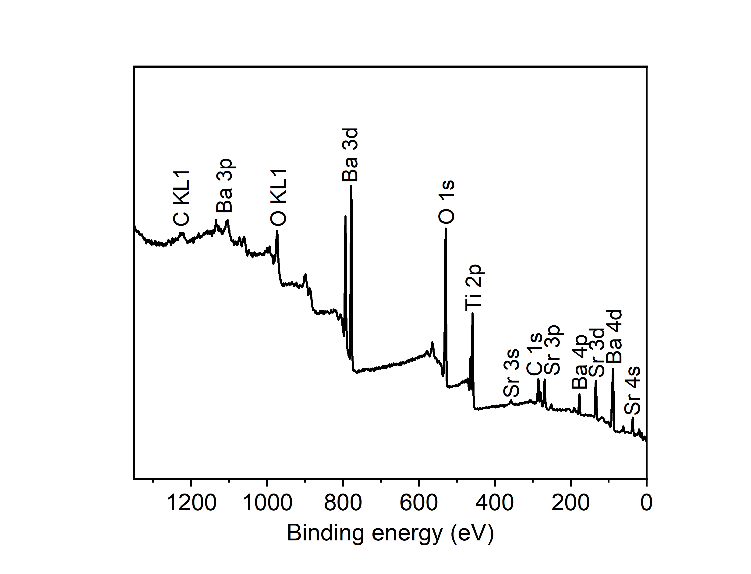


**Figure S3** XPS survey of the pyroTi surface.


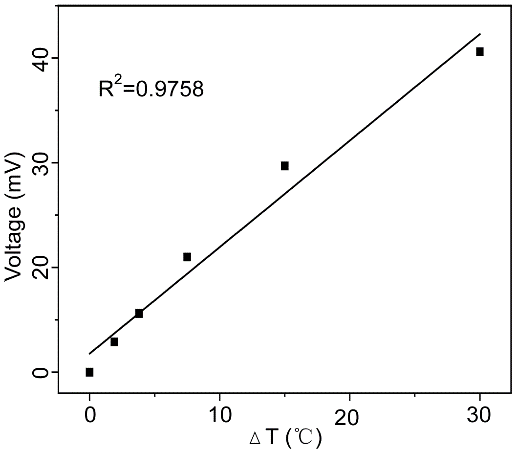


**Figure S4** Linear relationship between the pyroelectric potential (Φpyro) and temperature change (ΔT).


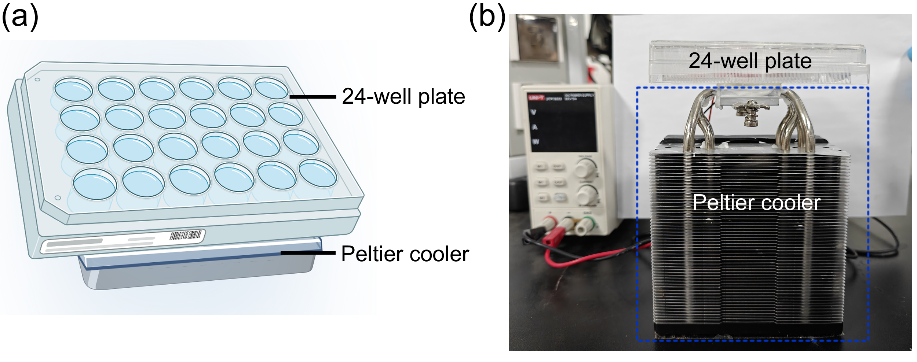


**Figure S5** (a) Schematic illustration and (b) profile display of the cold treatment process utilizing a Peltier cooler.


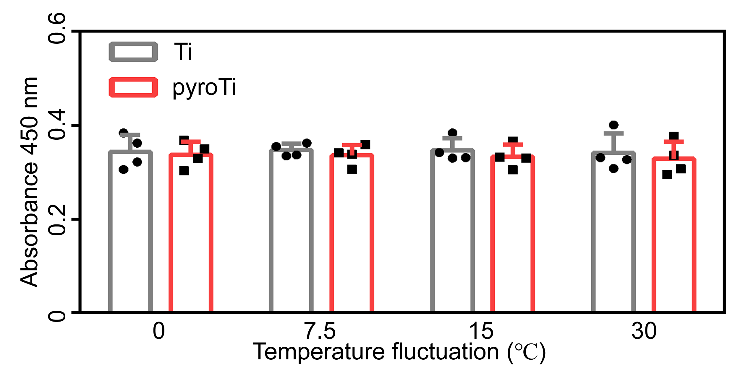


**Figure S6** MC-3T3 cell viability on Ti and pyroTi surfaces with different temperature fluctions (0 to 30 ℃). Data are presented as mean values ± SD (n = 4 for each group).


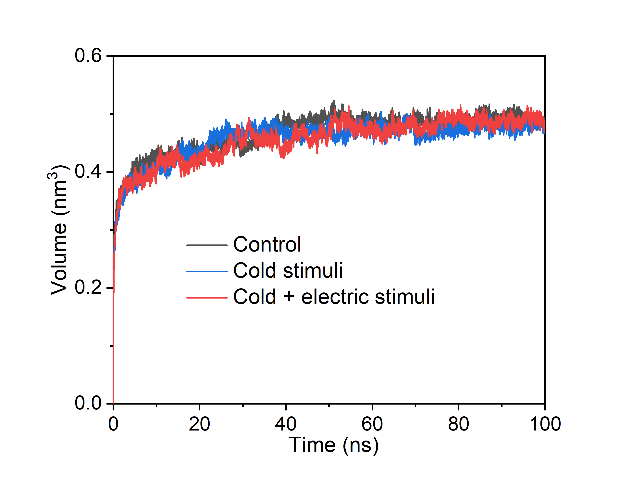


**Figure S7** Time series of RMSD values for the interaction of electric and cold stimuli with MmTRPM8.


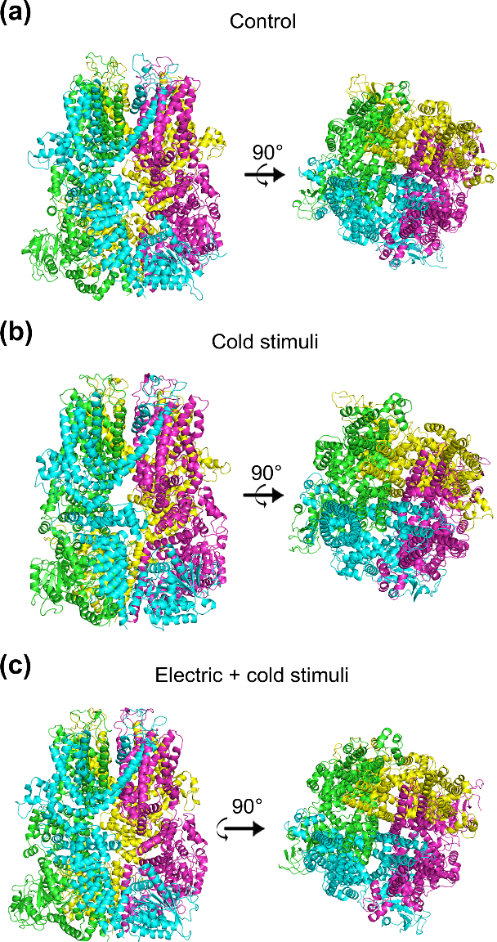


**Figure S8** Cartoon representation of MmTRPM8 with cold-induced pyroelectric stimulation.


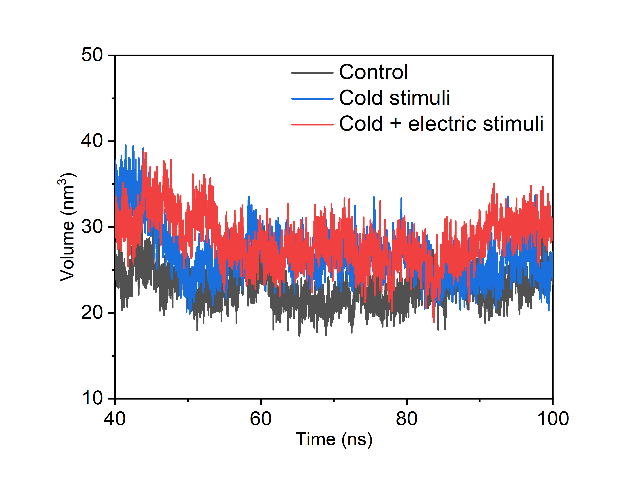


**Figure S9** Time series of volume of channel values for the interaction of electric stimulation and cold treatment with MmTRPM8.


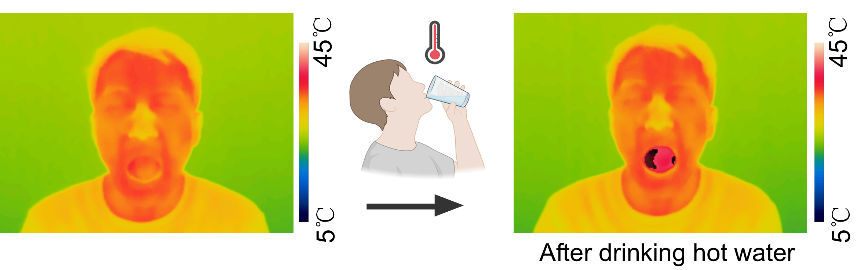


**Figure S10** The mouth temperature recorded by the infrared camera after drinking hot water.

**Table S1** Lattice parameters (a and c) of Barium titanate in pyroTi.

| Samples | Lattice parameter (±0.001 Å) | | c/a |
| --- | --- | --- | --- |
| a | c |
| pyroTi | 3.968 | 3.999 | 1.008 |

**Table S2** Rat species primers used for qRT-PCR and the corresponding annealing temperatures

| Gene | Forward primer sequence (5’–3’) | Forward primer sequence (5’–3’) | Annealing temperature(°C) | | Product size(bp) |
| --- | --- | --- | --- | --- | --- |
| ALP | ACAACACCAACGCTCAGGTC | GTGACCTCGTTCCCCTGAGT | | 60 | 142 |
| OPN | GGTGATAGCTTGGCTTACGGA | TGGCATCGGGATACTGTTCA | | 60 | 76 |
| Runx-2 | ACGAATGCACTATCCAGCCA | GCAGGTACGTGTGGTAGTGA | | 60 | 98 |
| OCN | TGACAAAGCCTTCATGTCCAAG | GAAGCCAATGTGGTCCGCTA | | 60 | 172 |
| GAPDH | CTGGAGAAACCTGCCAAGTATG | GGTGGAAGAATGGGAGTTGCT | | 60 | 138 |
